# THE JOURNAL OF NEUROPSYCHIATRY and Clinical Neurosciences

The Official Journal of the American Neuropsychiatric Association

## In this issue:

- A Psychological and Neuroanatomical Model of Obsessive-Compulsive Disorder
- The Differential Diagnosis of Childhood- and Young Adult-Onset Disorders That Include Psychosis
- Neural Correlates of Automatic and Controlled Auditory Processing in Schizophrenia
- Predictors of Depression and Anxiety in Patients with Intracranial Neoplasms
- Neuropsychological Deficits in Huntington's Disease Gene Carriers and Correlates of Early "Conversion"

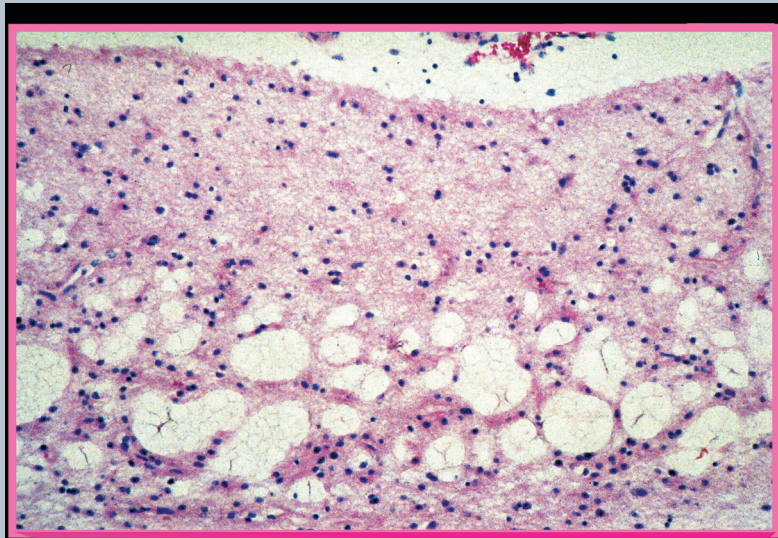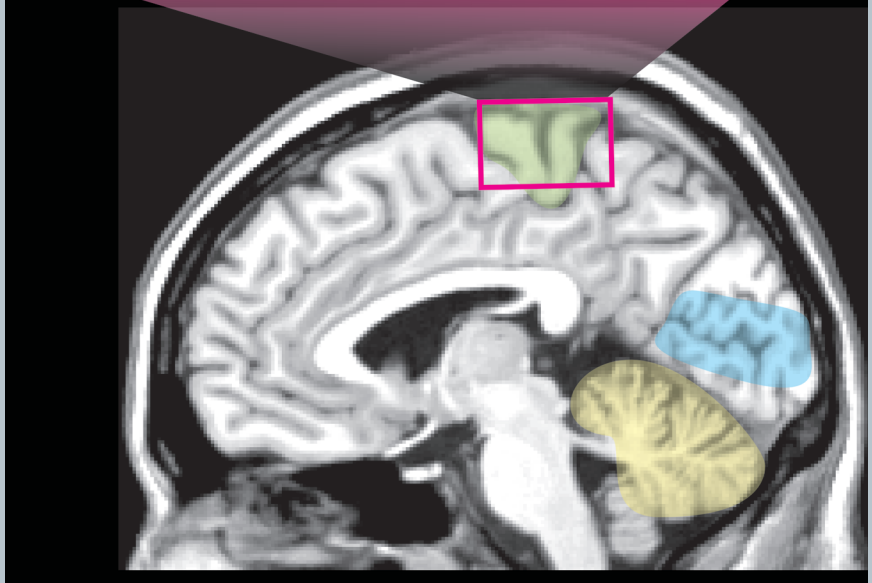

Volume 20 • Number 4 • Fall 2008

Visit our web site at:  
[neuro.psychiatryonline.org](http://neuro.psychiatryonline.org)
